# Supplementary material for: Rational Development of a Novel Hydrogel as a pH-Sensitive Controlled Release System for Nifedipine
Source: PubMed Central journal article supplement (PMC6403543; doi:10.3390/polym10070806), 2018-07-23
Supplement: polymers-10-00806-s001.pdf [file polymers-10-00806-s001.pdf]

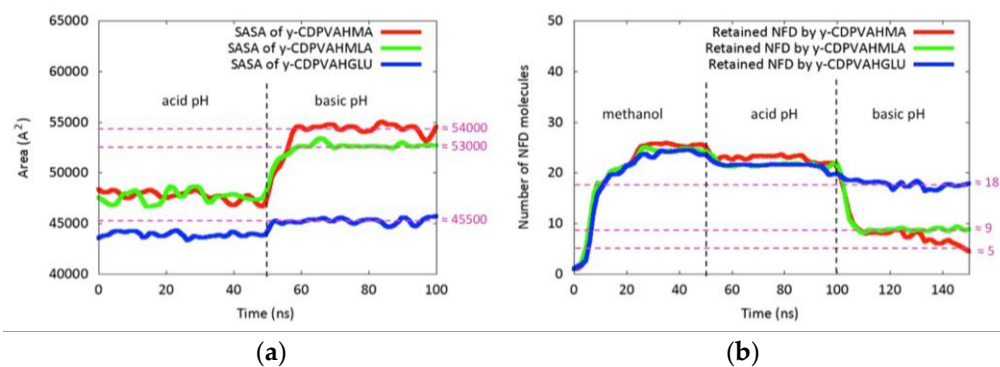

**Figure S1.** (a) Solvent Accessible Surface Area (SASA) plots of the hydrogels crosslinked with maleic acid ( $\gamma$ -CDPVAHMA), malic acid ( $\gamma$ -CDPVAHMLA) and glutamic ( $\gamma$ -CDPVAHGLU), at acid (0-50 ns) and neutral-basic pH (51-100 ns), respectively. (b) Number of NFD molecules retained by  $\gamma$ -CDPVAHMA,  $\gamma$ -CDPVAHMLA and  $\gamma$ -CDPVAHGLU during the three simulations: in methanol (0-50 ns), at acid pH (51-100 ns) and at neutral-basic pH (101-150 ns).
